# Supplementary material
Source: MDPI journal article supplement (https://www.mdpi.com/1999-4907/13/12/2045)
Supplement: s1 [file s1]

**Table S1.** Type of management in each agronomic system at the two study sites.

| Type of management                                                    | Annual number |                |              |             |                |
|-----------------------------------------------------------------------|---------------|----------------|--------------|-------------|----------------|
|                                                                       | Caaguazú      |                | Itapúa       |             |                |
|                                                                       | Conventional  | Agroecological | Conventional | Traditional | Agroecological |
| Mechanical tillage (tractor) <sup>a</sup>                             | 1             | 0              | 1            | 0           | 0              |
| Pyrethroid pesticide application (1.25 cc per 50 m <sup>2</sup> plot) | 2             | 0              | 2            | 1           | 0              |
| Glyphosate application (16.25 cc per 50 m <sup>2</sup> plot)          | 2             | 0              | 2            | 1           | 0              |
| Mechanical (motorized) brush cutter <sup>b</sup>                      | 1             | 1              | 1            | 1           | 1              |
| Manual weeding                                                        | 0             | 1              | 0            | 0           | 1              |
| Cow manure application (1 kg/m <sup>2</sup> plot) <sup>a</sup>        | 0             | 1              | 0            | 0           | 1              |
| Tree pruning <sup>c</sup>                                             | 1             | 1              | 1            | 1           | 1              |
| Planting of <i>Ilex paraguariensis</i>                                | 5             | 5              | 13           | 13          | 13             |
| Harvest of <i>Ilex paraguariensis</i> <sup>d</sup>                    | 1             | 1              | 1            | 1           | 1              |

<sup>a</sup> Only in year 1; <sup>b</sup> From year 2; <sup>c</sup> In years 2, 3, and 4; <sup>d</sup> Cutting branches from year 3.

**Table S2.** Initial average height measurements (m) of individuals planted in different experimental plots (p).

A – Caaguazú

| Species                           | Conventional system |      |      |            |      |      |       |      |      | Agroecological system |      |      |            |      |      |       |      |      |
|-----------------------------------|---------------------|------|------|------------|------|------|-------|------|------|-----------------------|------|------|------------|------|------|-------|------|------|
|                                   | Pathside            |      |      | Field edge |      |      | Islet |      |      | Pathside              |      |      | Field edge |      |      | Islet |      |      |
|                                   | p1                  | p2   | p3   | p1         | p2   | p3   | p1    | p2   | p3   | p1                    | p2   | p3   | p1         | p2   | p3   | p1    | p2   | p3   |
| <i>Cordia trichotoma</i>          | 0.57                | 0.44 | 0.57 | 0.47       | 0.78 | 0.55 | 0.53  | 0.55 | 0.44 | 0.25                  | 0.45 | 0.44 | 0.78       | 0.87 | 0.86 | 0.52  | 0.45 | 0.54 |
| <i>Handroanthus impetiginosus</i> | 0.46                | 0.55 | 0.76 | 0.55       | 0.67 | 0.57 | 0.87  | 0.48 | 0.56 | 0.43                  | 0.76 | 0.68 | 0.68       | 0.65 | 0.66 | 0.65  | 0.56 | 0.66 |
| <i>Cordia trichotoma</i>          | 0.50                | 0.48 | 0.44 | 0.67       | 0.52 | 0.76 | 0.58  | 0.67 | 0.65 | 0.28                  | 0.43 | 0.46 | 0.66       | 0.38 | 0.57 | 0.54  | 0.43 | 0.50 |
| <i>Cordia trichotoma</i>          | 0.65                | 0.76 | 0.63 | 0.49       | 0.55 | 0.49 | 0.47  | 0.40 | 0.40 | 0.32                  | 0.44 | 0.44 | 0.65       | 0.58 | 0.78 | 0.47  | 0.45 | 0.38 |
| <i>Handroanthus albus</i>         | 0.87                | 0.41 | 0.56 | 0.86       | 0.66 | 0.60 | 0.77  | 0.55 | 0.67 | 0.42                  | 0.68 | 0.66 | 0.56       | 0.78 | 0.55 | 0.48  | 0.50 | 0.78 |
| <i>Cordia americana</i>           | 0.54                | 0.39 | 0.65 | 0.67       | 0.56 | 0.77 | 0.67  | 0.51 | 0.65 | 0.41                  | 0.56 | 0.76 | 0.55       | 0.88 | 0.65 | 0.74  | 0.66 | 0.86 |
| <i>Cordia trichotoma</i>          | 0.44                | 0.44 | 0.55 | 0.48       | 0.51 | 0.58 | 0.45  | 0.48 | 0.56 | 0.28                  | 0.44 | 0.50 | 0.57       | 0.46 | 0.45 | 0.53  | 0.44 | 0.48 |
| <i>Peltophorum dubium</i>         | 0.67                | 0.55 | 0.45 | 0.72       | 0.56 | 0.59 | 0.76  | 0.67 | 0.55 | 0.44                  | 0.66 | 0.54 | 0.52       | 0.67 | 0.43 | 0.86  | 0.68 | 0.65 |
| <i>Cordia trichotoma</i>          | 0.68                | 0.87 | 0.52 | 0.49       | 0.67 | 0.65 | 0.54  | 0.44 | 0.57 | 0.63                  | 0.42 | 0.52 | 0.87       | 0.66 | 0.36 | 0.34  | 0.48 | 0.46 |
| <i>Cordia trichotoma</i>          | 0.63                | 0.78 | 0.53 | 0.46       | 0.54 | 0.66 | 0.51  | 0.46 | 0.58 | 0.35                  | 0.34 | 0.46 | 0.48       | 0.57 | 0.46 | 0.43  | 0.38 | 0.45 |
| <i>Handroanthus impetiginosus</i> | 0.41                | 0.44 | 0.45 | 0.55       | 0.55 | 0.55 | 0.55  | 0.78 | 0.67 | 0.45                  | 0.45 | 0.56 | 0.52       | 0.52 | 0.58 | 0.56  | 0.45 | 0.55 |
| <i>Cedrela fissilis</i>           | 0.55                | 0.46 | 0.43 | 0.69       | 0.63 | 0.78 | 0.56  | 0.54 | 0.48 | 0.47                  | 0.58 | 0.66 | 0.78       | 0.67 | 0.55 | 0.44  | 0.56 | 0.57 |
| <i>Cordia americana</i>           | 0.58                | 0.64 | 0.66 | 0.67       | 0.54 | 0.52 | 0.76  | 0.68 | 0.57 | 0.68                  | 0.83 | 0.87 | 0.56       | 0.65 | 0.50 | 0.86  | 0.59 | 0.66 |
| <i>Cedrela fissilis</i>           | 0.66                | 0.48 | 0.66 | 0.54       | 0.67 | 0.47 | 0.56  | 0.67 | 0.75 | 0.54                  | 0.35 | 0.56 | 0.55       | 0.45 | 0.46 | 0.68  | 0.58 | 0.58 |
| <i>Cordia trichotoma</i>          | 0.55                | 0.55 | 0.48 | 0.55       | 0.57 | 0.87 | 0.52  | 0.56 | 0.78 | 0.44                  | 0.45 | 0.45 | 0.59       | 0.76 | 0.88 | 0.46  | 0.54 | 0.45 |
| <i>Cordia trichotoma</i>          | 0.58                | 0.76 | 0.54 | 0.47       | 0.44 | 0.51 | 0.48  | 0.55 | 0.44 | 0.45                  | 0.52 | 0.65 | 0.47       | 0.50 | 0.54 | 0.46  | 0.49 | 0.33 |
| <i>Handroanthus albus</i>         | 0.48                | 0.58 | 0.58 | 0.48       | 0.45 | 0.76 | 0.67  | 0.67 | 0.65 | 0.65                  | 0.58 | 0.57 | 0.68       | 0.75 | 0.49 | 0.44  | 0.67 | 0.56 |
| <i>Cordia trichotoma</i>          | 0.52                | 0.44 | 0.47 | 0.49       | 0.55 | 0.72 | 0.78  | 0.49 | 0.57 | 0.45                  | 0.38 | 0.56 | 0.55       | 0.54 | 0.54 | 0.48  | 0.56 | 0.39 |

**Table S2.** (continued)

B – Itapúa

|                       | Species                           | p1   | p2   | p3   | p4   | p5   | p6   | p7   | p8   | p9   | p10  |
|-----------------------|-----------------------------------|------|------|------|------|------|------|------|------|------|------|
| Conventional system   | <i>Handroanthus impetiginosus</i> | 0.82 | 0.48 | 0.65 | 0.49 | 0.50 | 0.67 | 0.61 | 0.55 | 0.51 | 0.46 |
|                       | <i>Handroanthus albus</i>         | 0.58 | 0.45 | 0.47 | 0.44 | 0.62 | 0.48 | 0.62 | 0.51 | 0.67 | 0.69 |
|                       | <i>Peltophorum dubium</i>         | 0.50 | 0.87 | 0.58 | 0.66 | 0.61 | 0.76 | 0.55 | 0.66 | 0.72 | 0.77 |
|                       | <i>Cordia trichotoma</i>          | 0.55 | 0.55 | 0.67 | 0.69 | 0.75 | 0.92 | 0.50 | 0.75 | 0.55 | 0.52 |
|                       | <i>Peltophorum dubium</i>         | 0.52 | 0.56 | 0.50 | 0.49 | 0.58 | 0.70 | 0.48 | 0.74 | 0.62 | 0.58 |
|                       | <i>Cedrela fissilis</i>           | 0.67 | 0.53 | 0.62 | 0.44 | 0.56 | 0.66 | 0.59 | 0.57 | 0.48 | 0.50 |
|                       | <i>Handroanthus impetiginosus</i> | 0.61 | 0.49 | 0.60 | 0.65 | 0.53 | 0.54 | 0.61 | 0.73 | 0.58 | 0.68 |
|                       | <i>Cordia trichotoma</i>          | 0.60 | 0.61 | 0.69 | 0.74 | 0.50 | 0.52 | 0.86 | 0.83 | 0.47 | 0.88 |
| Traditional system    | <i>Handroanthus impetiginosus</i> | 0.83 | 0.50 | 0.62 | 0.77 | 0.50 | 0.67 | 0.55 | 0.51 | 0.58 | 0.48 |
|                       | <i>Handroanthus albus</i>         | 0.58 | 0.49 | 0.47 | 0.54 | 0.55 | 0.63 | 0.52 | 0.69 | 0.57 | 0.70 |
|                       | <i>Peltophorum dubium</i>         | 0.56 | 0.55 | 0.55 | 0.64 | 0.62 | 0.66 | 0.49 | 0.66 | 0.73 | 0.76 |
|                       | <i>Cordia trichotoma</i>          | 0.63 | 0.67 | 0.67 | 0.59 | 0.69 | 0.81 | 0.87 | 0.59 | 0.52 | 0.44 |
|                       | <i>Peltophorum dubium</i>         | 0.55 | 0.54 | 0.67 | 0.78 | 0.48 | 0.61 | 0.53 | 0.56 | 0.69 | 0.59 |
|                       | <i>Cedrela fissilis</i>           | 0.66 | 0.50 | 0.56 | 0.66 | 0.55 | 0.57 | 0.56 | 0.47 | 0.50 | 0.47 |
|                       | <i>Handroanthus impetiginosus</i> | 0.76 | 0.59 | 0.66 | 0.44 | 0.45 | 0.52 | 0.49 | 0.55 | 0.55 | 0.55 |
|                       | <i>Cordia trichotoma</i>          | 0.88 | 0.52 | 0.74 | 0.49 | 0.44 | 0.69 | 0.76 | 0.72 | 0.52 | 0.44 |
| Agroecological system | <i>Handroanthus impetiginosus</i> | 0.64 | 0.59 | 0.54 | 0.64 | 0.59 | 0.42 | 0.50 | 0.56 | 0.53 | 0.45 |
|                       | <i>Handroanthus albus</i>         | 0.67 | 0.55 | 0.59 | 0.55 | 0.56 | 0.59 | 0.65 | 0.48 | 0.69 | 0.50 |
|                       | <i>Peltophorum dubium</i>         | 0.55 | 0.44 | 0.56 | 0.48 | 0.44 | 0.63 | 0.55 | 0.78 | 0.47 | 0.55 |
|                       | <i>Cordia trichotoma</i>          | 0.74 | 0.63 | 0.43 | 0.68 | 0.68 | 0.88 | 0.73 | 0.75 | 0.74 | 0.78 |
|                       | <i>Peltophorum dubium</i>         | 0.72 | 0.54 | 0.73 | 0.52 | 0.49 | 0.67 | 0.55 | 0.58 | 0.68 | 0.65 |
|                       | <i>Cedrela fissilis</i>           | 0.44 | 0.49 | 0.56 | 0.52 | 0.54 | 0.51 | 0.44 | 0.55 | 0.51 | 0.59 |
|                       | <i>Handroanthus impetiginosus</i> | 0.43 | 0.44 | 0.65 | 0.87 | 0.46 | 0.62 | 0.45 | 0.44 | 0.45 | 0.50 |
|                       | <i>Cordia trichotoma</i>          | 0.67 | 0.77 | 0.76 | 0.80 | 0.67 | 0.49 | 0.78 | 0.76 | 0.69 | 0.82 |

**Table S3.** Plausible models for the survival, growth and regeneration of planted species in the two agroforestry experiments

| Survival     |                    |                    |                    |              |               |             |                |                  |                  |                |           |                  |                  |                  |  |
|--------------|--------------------|--------------------|--------------------|--------------|---------------|-------------|----------------|------------------|------------------|----------------|-----------|------------------|------------------|------------------|--|
| Caaguazú     | (Intercept)        | Sp                 | Ag.Sy <sub>s</sub> | Pl.Type      | Time          | Sp*Ag.Sys   | Sp*Pl.Type     | Sp*Time          | Pl.Type*Time     | Pl.Type*Ag.Sys |           |                  |                  |                  |  |
| 512          | 3590128            | +                  | +                  | +            | -<br>20242831 | +           | +              | +                | +                | +              |           |                  |                  |                  |  |
| 1024         | 3750841            | +                  | +                  | +            | -<br>22070376 | +           | +              | +                | +                | +              |           |                  |                  |                  |  |
| 384          | 3656629            | +                  | +                  | +            | -<br>21028710 | +           | +              | +                | NA               | +              |           |                  |                  |                  |  |
|              | Sp* Pl.Type*Ag.Sys | Time*Ag.Sys        | df                 | logLik       | AICc          | delta       | weight         | R <sup>2</sup> m | R <sup>2</sup> c |                |           |                  |                  |                  |  |
| 512          | NA                 | NA                 | 35                 | -<br>4439055 | 959.811       | 0           | 269608,5       | 0.868704         | 0.8748712        |                |           |                  |                  |                  |  |
| 1024         | NA                 | +                  | 36                 | -<br>4431835 | 960.483       | 0.6720045   | 192668,1       | 0.867128         | 0.873376         |                |           |                  |                  |                  |  |
| 384          | NA                 | NA                 | 33                 | -<br>4466650 | 961.1081      | 1.2971396   | 140949,4       | 0.8633484        | 0.8693383        |                |           |                  |                  |                  |  |
| Itapúa       |                    |                    |                    |              |               |             |                |                  |                  |                |           |                  |                  |                  |  |
| (Intercept)  | Sp                 | Ag.Sy <sub>s</sub> | Time               | Sp*Time      | Sp*Ag.Sys     | Time*Ag.Sys | df             | logLik           | AICc             | delta          | weight    | R <sup>2</sup> m | R <sup>2</sup> c |                  |  |
| 24           | 0.5699077          | +                  | +                  | -<br>1301533 | NA            | +           | NA             | 17               | -2608205         | 556.5128       | 0         | 863392,6         | 0.2894882        | 0.29242          |  |
| Growth       |                    |                    |                    |              |               |             |                |                  |                  |                |           |                  |                  |                  |  |
| Caaguazú     | (Intercept)        | Sp                 | Ag.Sy <sub>s</sub> | Pl.Type      | Sp*Ag.Sys     | Sp*Pl.Type  | Pl.Type*Ag.Sys | df               | logLik           | AICc           | delta     | weight           | R <sup>2</sup> m | R <sup>2</sup> c |  |
| 40           | 6978656            | +                  | +                  | +            | NA            | NA          | +              | 12               | 1505217          | 298.5042       | 0         | 946708,8         | 0.867128         | 0.873376         |  |
| Regeneration |                    |                    |                    |              |               |             |                |                  |                  |                |           |                  |                  |                  |  |
| Caaguazú     | (Intercept)        | Sp                 | Ag.Sy <sub>s</sub> | Pl.Type      | Sp*Ag.Sys     | Sp*Pl.Type  | Ag.Sys*Pl.Type | df               | logLik           | AICc           | delta     | weight           |                  |                  |  |
| 22           | -193025850         | +                  | +                  | NA           | +             | NA          | NA             | 12               | -6625826         | 159.8007       | 0         | 676183,7         |                  |                  |  |
| 24           | -200038011         | +                  | +                  | +            | +             | NA          | NA             | 14               | -6455608         | 161.6283       | 1,827,547 | 271155,1         |                  |                  |  |

| Itapúa | (Intercept) | Sp | Ag.Sy<br>s | df | logLik  | AICc     | delta | weight   |
|--------|-------------|----|------------|----|---------|----------|-------|----------|
| 4      | -18.56      | +  | +          | 7  | -57.896 | 130.8007 | 0     | 676183,7 |

Abbreviations: AICc, Akaike Information Criterion corrected for  $\Delta AICc \leq 2$ ;  $R^2c$ : conditional  $R^2$  indicating the variability explained by the fixed and random effects;  $R^2m$ , marginal  $R^2$  that considers only the variability explained by the fixed effects; +: fixed and random effects terms that influence the response variable in each set of models; Sp: Specie, Ag.Sys: Agronomic System, Pl.Type: Plantation type.

**Table S4.** Descriptive statistics of the survival, growth, and natural regeneration of planted species at the two study locations, stratified by agronomic system and plantation type.

| Variable                                                 | Total                         | Agronomic system  |                   |               | Plantation type   |                   |                   |
|----------------------------------------------------------|-------------------------------|-------------------|-------------------|---------------|-------------------|-------------------|-------------------|
|                                                          |                               | Conventional      | Agroecological    | Traditional   | Pathsides         | Field edges       | Islets            |
| a) Survival (%)                                          |                               |                   |                   |               |                   |                   |                   |
| Caaguazú                                                 |                               |                   |                   |               |                   |                   |                   |
| <i>C. fissilis</i>                                       | 33.3 ±34.3 <sup>a</sup>       | 22.2 ± 26.3       | 50.0 ± 35.3       | N/A           | 58.3 ± 20.4       | 41.7 ± 37.6       | 8.33 ± 20.4       |
| <i>C. trichotoma</i>                                     | 64.2 ±23.7 <sup>b</sup>       | 63.0 ± 24.8       | 65.4 ± 23.9       | N/A           | 77.8 ± 17.2       | 46.3 ± 23.7       | 68.5 ± 20.4       |
| <i>H. albus</i>                                          | 77.8 ±30.8 <sup>b</sup>       | 72.2 ± 36.3       | 83.3 ± 25.0       | N/A           | 58.3 ± 20.4       | 75.0 ± 41.8       | 100 ± 0.00        |
| <i>H. impetiginosus</i>                                  | 80.6 ±30.4 <sup>b</sup>       | 77.8 ± 36.3       | 83.3 ± 25.0       | N/A           | 75.0 ± 27.4       | 75.0 ± 41.8       | 91.7 ± 20.4       |
| <i>P. dubium</i>                                         | 72.22 ±46.1 <sup>b</sup>      | 66.7 ± 33.3       | 77.8 ± 19.2       | N/A           | 66.7 ± 0.00       | 66.7 ± 47.1       | 83.3 ± 23.6       |
| <i>C. americana</i>                                      | 91.7 ±19.2 <sup>b</sup>       | 83.3 ± 25.0       | 100 ± 0.00        | N/A           | 91.7 ± 20.4       | 83.3 ± 25.8       | 100 ± 0.00        |
| Itapúa                                                   |                               |                   |                   |               |                   |                   |                   |
| <i>C. fissilis</i>                                       | 33.3 ±47.9 <sup>a</sup>       | 40.0 ± 51.6       | 20.0 ± 42.2       | 40.00 ± 51.64 | N/A               | N/A               | N/A               |
| <i>C. trichotoma</i>                                     | 75.0 ±36.5 <sup>b</sup>       | 80.0 ± 35.0       | 90.0 ± 21.1       | 56.00 ± 43.76 | N/A               | N/A               | N/A               |
| <i>H. albus</i>                                          | 73.33 ±44.98 <sup>b</sup>     | 70.0 ± 48.3       | 70.0 ± 48.3       | 80.00 ± 42.16 | N/A               | N/A               | N/A               |
| <i>H. impetiginosus</i>                                  | 58.3 ±39.6 <sup>b</sup>       | 90.0 ± 21.1       | 45.0 ± 36.9       | 40.00 ± 39.44 | N/A               | N/A               | N/A               |
| <i>P. dubium</i>                                         | 65.3 ±36.9 <sup>b</sup>       | 60.0 ± 39.4       | 65.0 ± 33.7       | 80.00 ± 34.96 | N/A               | N/A               | N/A               |
| b) Relative growth rate in height (m/day <sup>-1</sup> ) |                               |                   |                   |               |                   |                   |                   |
| Caaguazú                                                 |                               |                   |                   |               |                   |                   |                   |
| <i>C. fissilis</i>                                       | 0,00142 ±0,00042 <sup>b</sup> | 0,00144 ± 0,00066 | 0,00137 ± 0,00038 | N/A           | 0,00147 ± 0,00046 | 0,00131 ± 0,00053 | 0,00123 ± 0,00012 |

|                                                           |                                |                   |                   |                   |                   |                   |                   |
|-----------------------------------------------------------|--------------------------------|-------------------|-------------------|-------------------|-------------------|-------------------|-------------------|
| <i>C. trichotoma</i>                                      | 0.00185 ± 0.00017 <sup>b</sup> | 0.00198 ± 0.00029 | 0.00176 ± 0.00033 | N/A               | 0.00193 ± 0.00035 | 0.00184 ± 0.00031 | 0.00182 ± 0.00031 |
| <i>H. albus</i>                                           | 0.00142 ± 0.00024 <sup>a</sup> | 0.00148 ± 0.00030 | 0.00137 ± 0.00023 | N/A               | 0.00143 ± 0.00024 | 0.00149 ± 0.00028 | 0.00137 ± 0.00028 |
| <i>H. impetiginosus</i>                                   | 0.00148 ± 0.00027 <sup>b</sup> | 0.00153 ± 0.00020 | 0.00146 ± 0.00037 | N/A               | 0.00153 ± 0.00022 | 0.00161 ± 0.00031 | 0.00137 ± 0.00032 |
| <i>P. dubium</i>                                          | 0.00138 ± 0.00023 <sup>b</sup> | 0.00141 ± 0.00027 | 0.00135 ± 0.00018 | N/A               | 0.00134 ± 0.00027 | 0.00139 ± 0.00019 | 0.00139 ± 0.00029 |
| <i>C. americana</i>                                       | 0.00117 ± 0.00025 <sup>a</sup> | 0.00129 ± 0.00019 | 0.00103 ± 0.00031 | N/A               | 0.00116 ± 0.00030 | 0.00132 ± 0.00018 | 0.00101 ± 0.00030 |
| Itapúa                                                    |                                |                   |                   |                   |                   |                   |                   |
| <i>C. fissilis</i>                                        | 0.00198 ± 0.00038 <sup>b</sup> | 0.00204 ± 0.00061 | 0.00202 ± 0.00027 | 0.00191 ± 0.00014 | N/A               | N/A               | N/A               |
| <i>C. trichotoma</i>                                      | 0.00232 ± 0.00014 <sup>a</sup> | 0.00228 ± 0.00028 | 0.00231 ± 0.00010 | 0.00237 ± 0.00012 | N/A               | N/A               | N/A               |
| <i>H. albus</i>                                           | 0.00214 ± 0.00018 <sup>b</sup> | 0.00198 ± 0.00016 | 0.00216 ± 0.00018 | 0.00217 ± 0.00016 | N/A               | N/A               | N/A               |
| <i>H. impetiginosus</i>                                   | 0.00205 ± 0.00023 <sup>b</sup> | 0.00207 ± 0.00026 | 0.00213 ± 0.00029 | 0.00200 ± 0.00015 | N/A               | N/A               | N/A               |
| <i>P. dubium</i>                                          | 0.00214 ± 0.00022 <sup>b</sup> | 0.00218 ± 0.00020 | 0.00210 ± 0.00028 | 0.00218 ± 0.00024 | N/A               | N/A               | N/A               |
| c) Natural regeneration (individuals plot <sup>-1</sup> ) |                                |                   |                   |                   |                   |                   |                   |
| Caaguazú                                                  |                                |                   |                   |                   |                   |                   |                   |
| <i>C. trichotoma</i>                                      | 0.33 ± 0.48 <sup>b</sup>       | 0.22 ± 0.44       | 0.44 ± 0.53       | N/A               | 0.17 ± 0.41       | 0.33 ± 0.52       | 0.50 ± 0.55       |
| <i>H. albus</i>                                           | 1.83 ± 3.17 <sup>a</sup>       | 3.00 ± 3.43       | 0.11 ± 0.33       | N/A               | 3.17 ± 3.87       | 1.17 ± 2.40       | 0.33 ± 0.82       |
| <i>P. dubium</i>                                          | 1.06 ± 0.80 <sup>b</sup>       | 0.89 ± 0.93       | 1.22 ± 0.67       | N/A               | 0.67 ± 0.52       | 1.17 ± 0.98       | 1.33 ± 0.82       |
| Itapúa                                                    |                                |                   |                   |                   |                   |                   |                   |
| <i>C. trichotoma</i>                                      | 0.23 ± 0.57 <sup>a</sup>       | 0.20 ± 0.42       | 0.50 ± 0.85       | 0.08 ± 0.44       | N/A               | N/A               | N/A               |
| <i>H. albus</i>                                           | 0.27 ± 0.52 <sup>a</sup>       | 0.20 ± 0.42       | 0.50 ± 0.71       | 0.10 ± 0.32       | N/A               | N/A               | N/A               |
| <i>P. dubium</i>                                          | 0.27 ± 0.58 <sup>a</sup>       | 0.10 ± 0.32       | 0.50 ± 0.85       | 0.20 ± 0.42       | N/A               | N/A               | N/A               |

N/A, not applicable.

Different superscripts indicate statistical differences at  $p < 0.05$

**Table S5.** Initial physical and chemical properties of the soil in the experimental plots in Caaguazú (Year= 2010).

| Ag.Sys       | Pl.Type    | pH                       | Organic material (%)     | Al <sup>+3</sup> +H <sup>+</sup> (Cmol.kg <sup>-1</sup> ) | Compaction (kpa <sup>-1</sup> ) | Depth (cm)   | Soil texture     |
|--------------|------------|--------------------------|--------------------------|-----------------------------------------------------------|---------------------------------|--------------|------------------|
| Conventional | Pathside   | 4,53 ± 0,07 <sup>a</sup> | 1,65 ± 0,20 <sup>M</sup> | 2,19 ± 0,25 <sup>H</sup>                                  | 0,97 ± 0,06 <sup>VC</sup>       | 10,35 ± 0,86 | clay-sandy frank |
|              | Islet      | 4,8 ± 0,21 <sup>a</sup>  | 2,27 ± 0,11 <sup>M</sup> | 1,33 ± 0,39 <sup>H</sup>                                  | 0,89 ± 0,04 <sup>VC</sup>       | 11,18 ± 1,24 | clay-sandy frank |
|              | Field edge | 4,83 ± 0,30 <sup>a</sup> | 2,36 ± 0,29 <sup>M</sup> | 1,33 ± 0,53 <sup>H</sup>                                  | 0,47 ± 0,04 <sup>F</sup>        | 12,57 ± 0,78 | clay-sandy frank |
|              | Ref.Ecos   | 6,50 <sup>n</sup>        | 2,91 <sup>H</sup>        | 1,25 <sup>H</sup>                                         | 0,18 <sup>S</sup>               | 22,34        | clay-sandy frank |

|                |            |                          |                         |                         |                         |             |                  |
|----------------|------------|--------------------------|-------------------------|-------------------------|-------------------------|-------------|------------------|
| Agroecological | Pathside   | 5,27 ±0,37 <sup>a</sup>  | 0,81 ±0,05 <sup>L</sup> | 0,47 ±0,54 <sup>M</sup> | 0,31 ±0,04 <sup>F</sup> | 16,58 ±1,22 | Sandy-clay frank |
|                | Islet      | 5,43 ±0,14 <sup>a</sup>  | 0,81 ±0,07 <sup>L</sup> | 0,24 ±0,30 <sup>L</sup> | 0,29 ±0,04 <sup>F</sup> | 17,33 ±1,08 | Sandy-clay frank |
|                | Field edge | 6,32 ±0,72 <sup>sa</sup> | 1,29 ±0,78 <sup>M</sup> | 0,00 <sup>L</sup>       | 0,26 ±0,02 <sup>F</sup> | 19,12 ±1,23 | Sandy-clay frank |
|                | Ref.Ecos   | 6,52 <sup>n</sup>        | 2,88 <sup>H</sup>       | 0,00 <sup>L</sup>       | 0,16 <sup>S</sup>       | 24,20       | Sandy-clay frank |

**Legend:** Ag.Syst = Agronomic system, Pl.Type = Plantation type, Ref.Ecos= Reference ecosystem, a = acid, la = slightly acidic, n = neutral, A = High, M = Medium, L = Low, VC = Very compact, F = Firm, S = Soft. (Source: Soil Laboratory, Faculty of Agricultural Sciences, National University of Asunción, 2010)





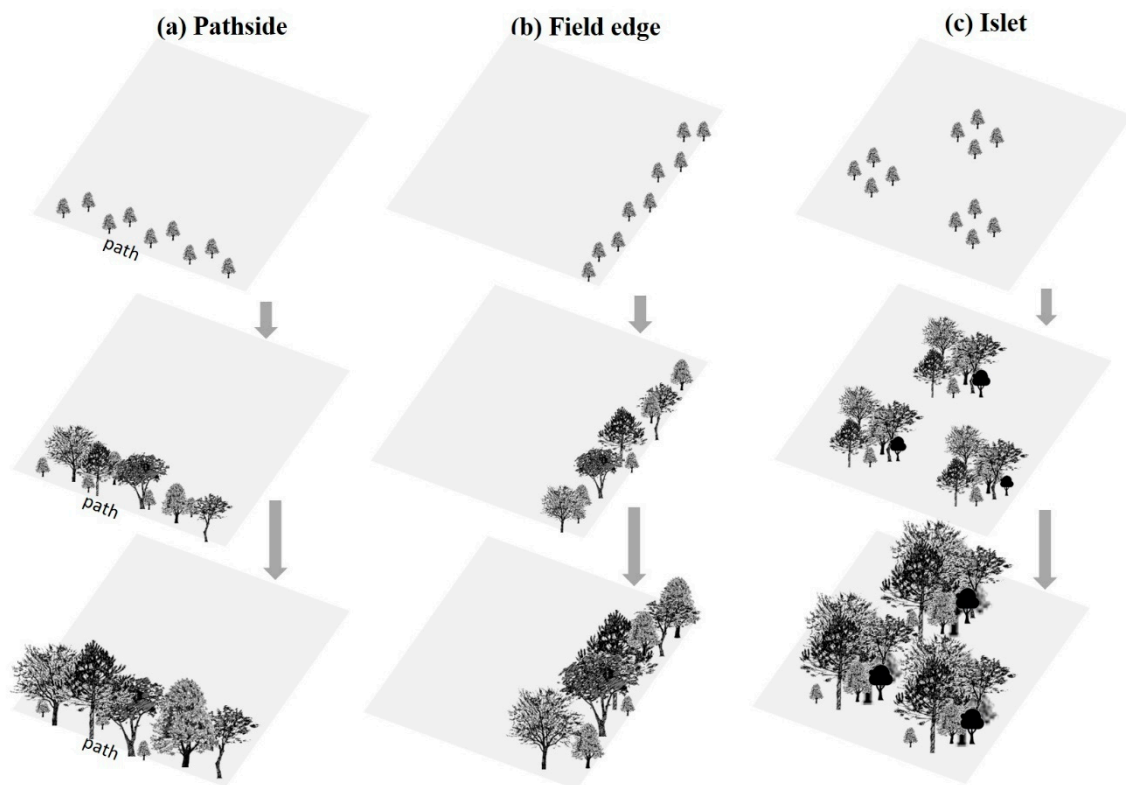

Figure S1. Plot design.

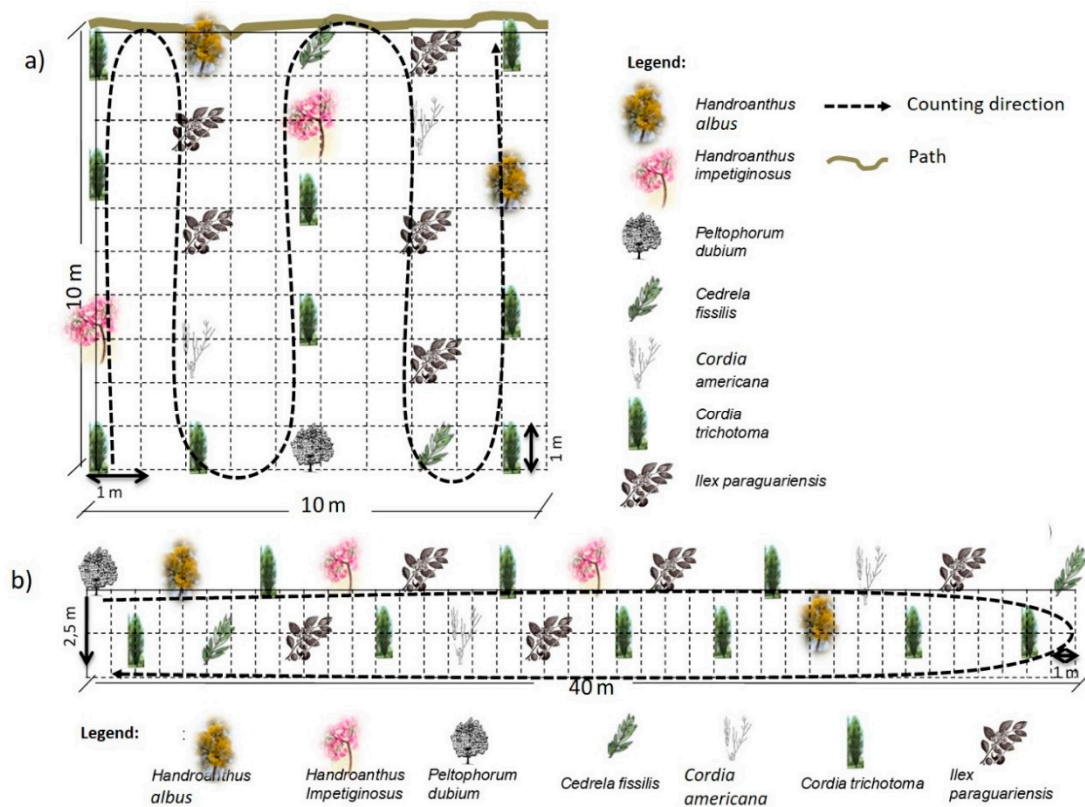

Figure S2. Experiment design in Caaguazú. Arrangement in a) pathside and islet plots and b) field edge plots.

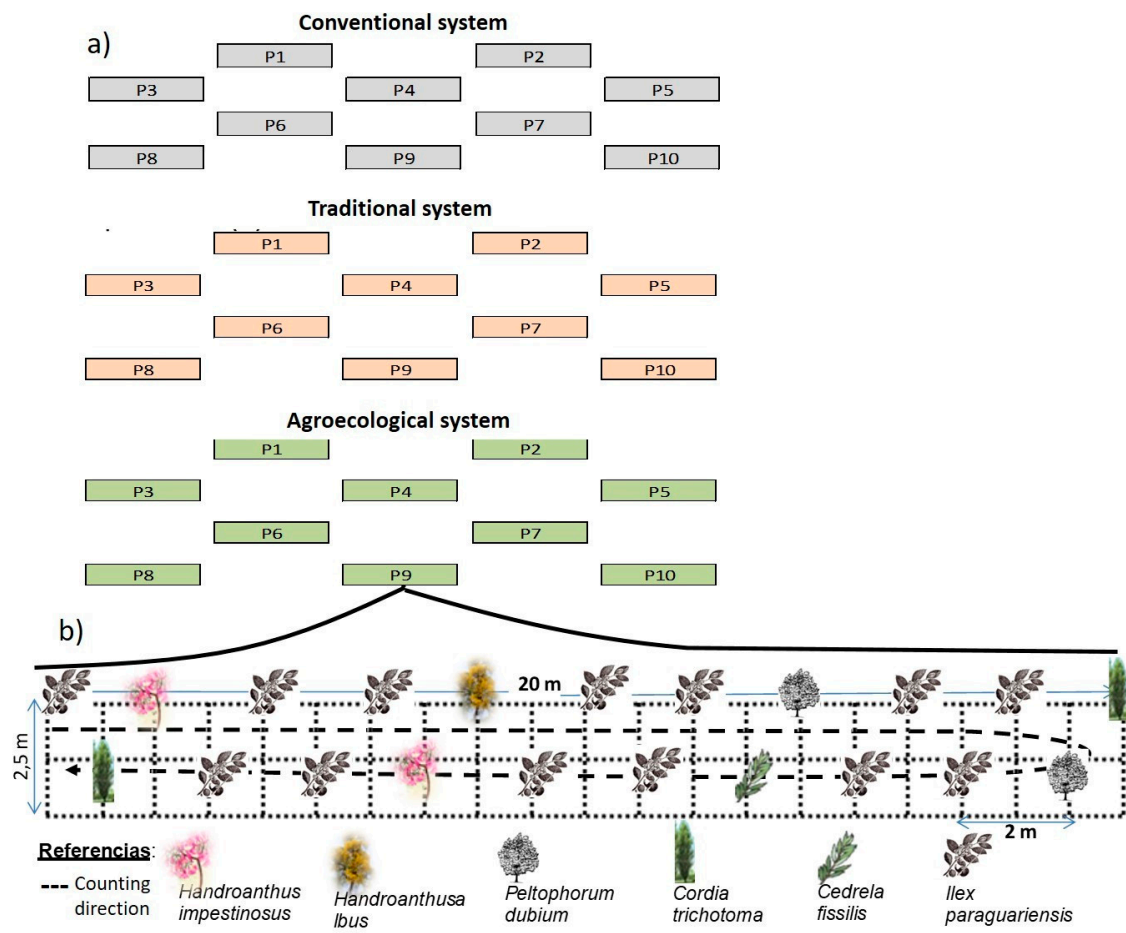

Figure S3. Experiment design in Itapúa. Arrangement in a) plots in the types of plantation and b) plants on the plot.
